# Supplementary material for: A novel mitochondrial outer membrane protein, MOMA-1, that affects cristae morphology in Caenorhabditis elegans
Source: PubMed Central journal article supplement — Mol Biol Cell. 2011 Mar 15;22(6):831–41. doi: 10.1091/mbc.E10-07-0600 (PMC3057707; doi:10.1091/mbc.e10-07-0600), 2011-03-15
Supplement: E10-07-0600_1.pdf [file E10-07-0600_1.pdf]

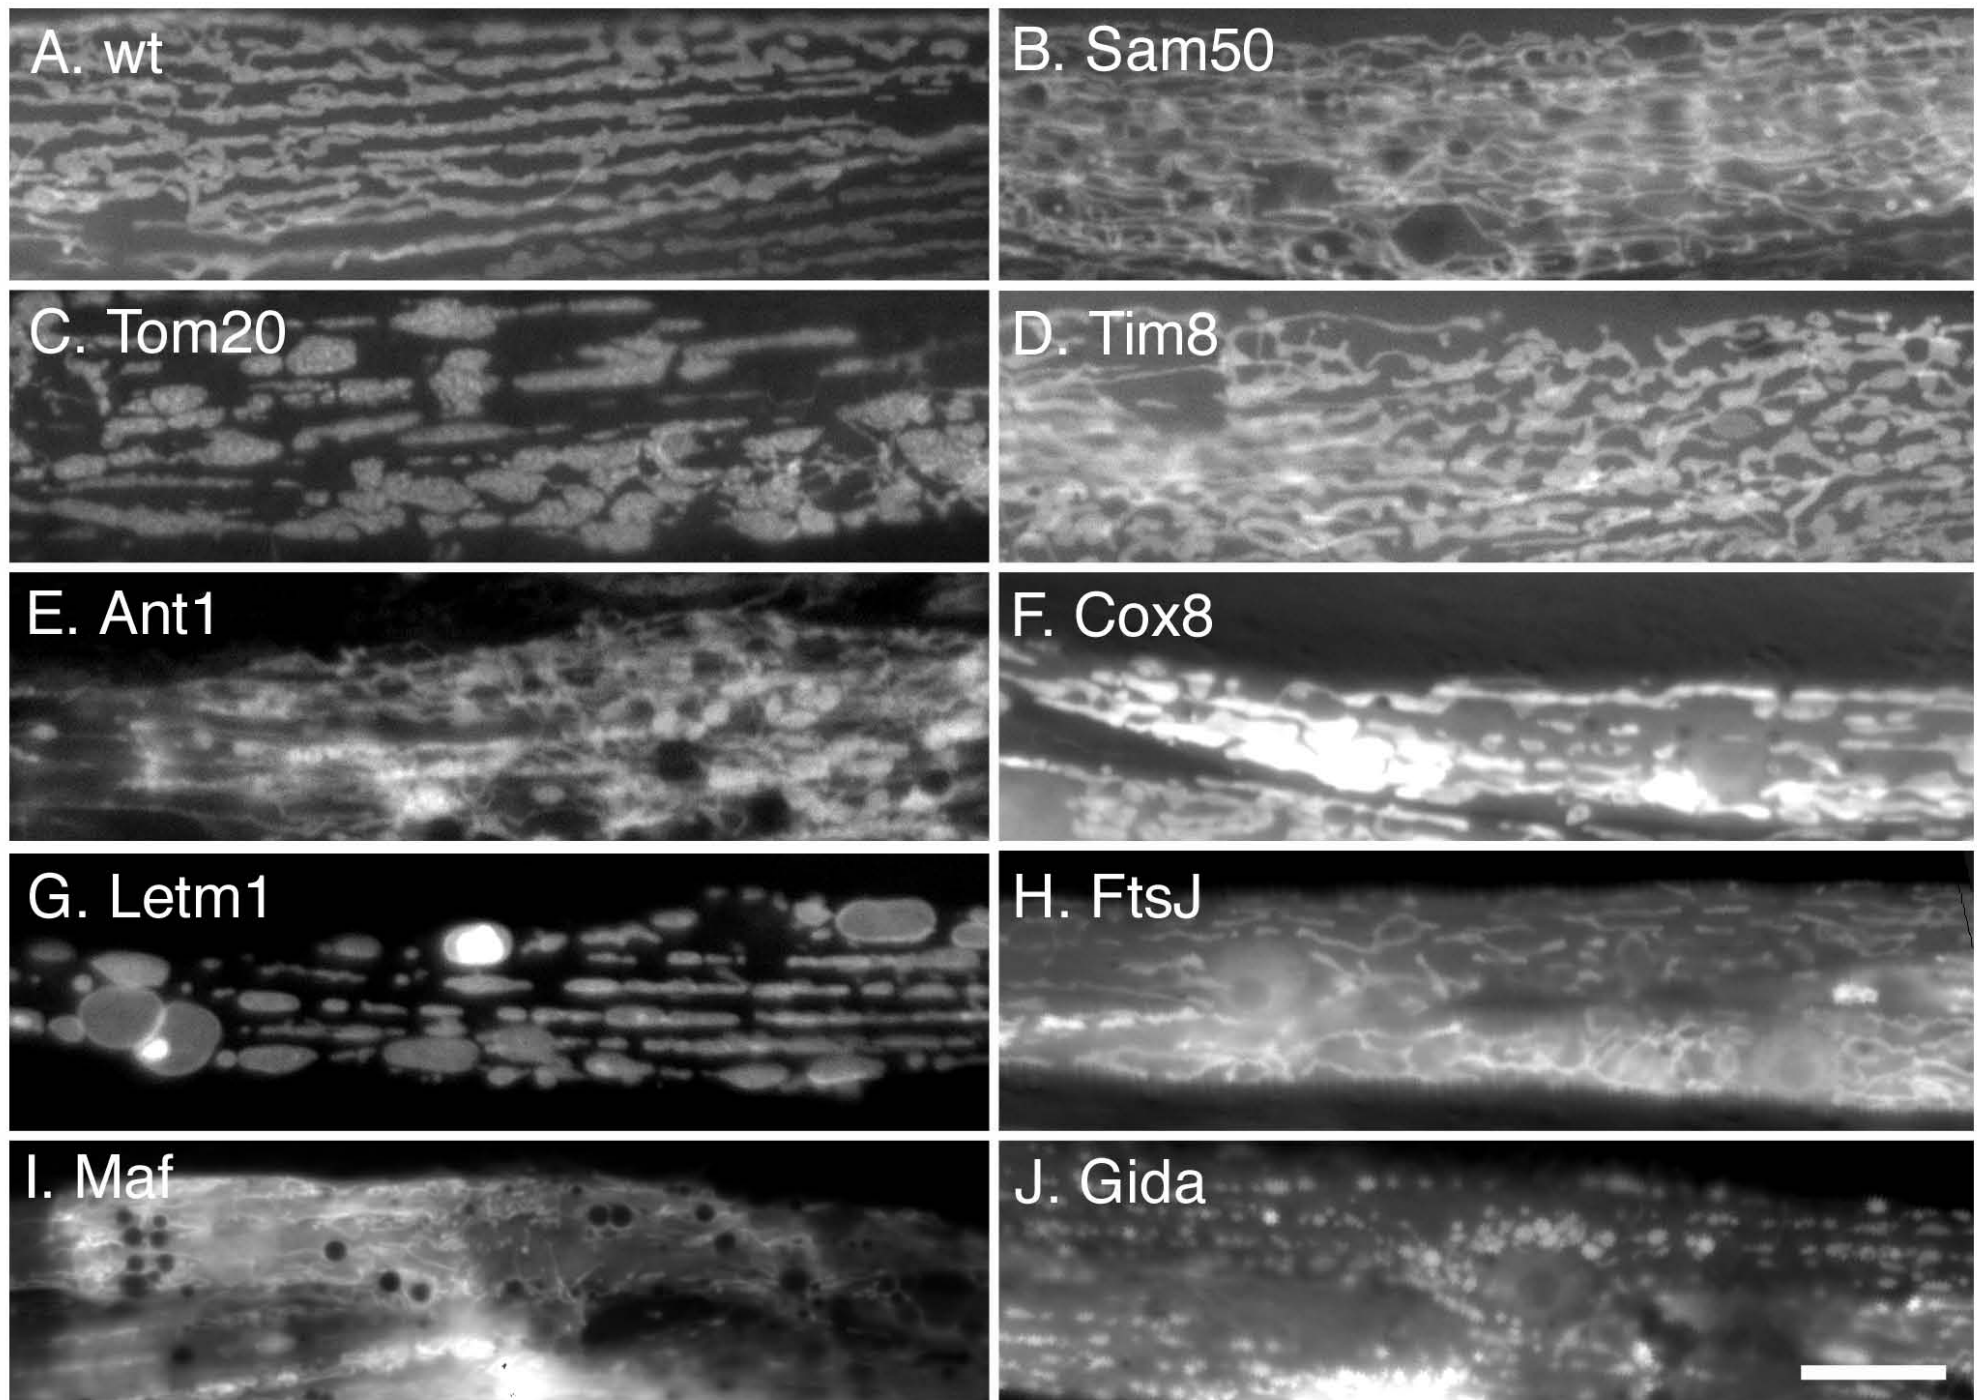

Suppl. Fig. 1. Head et al.

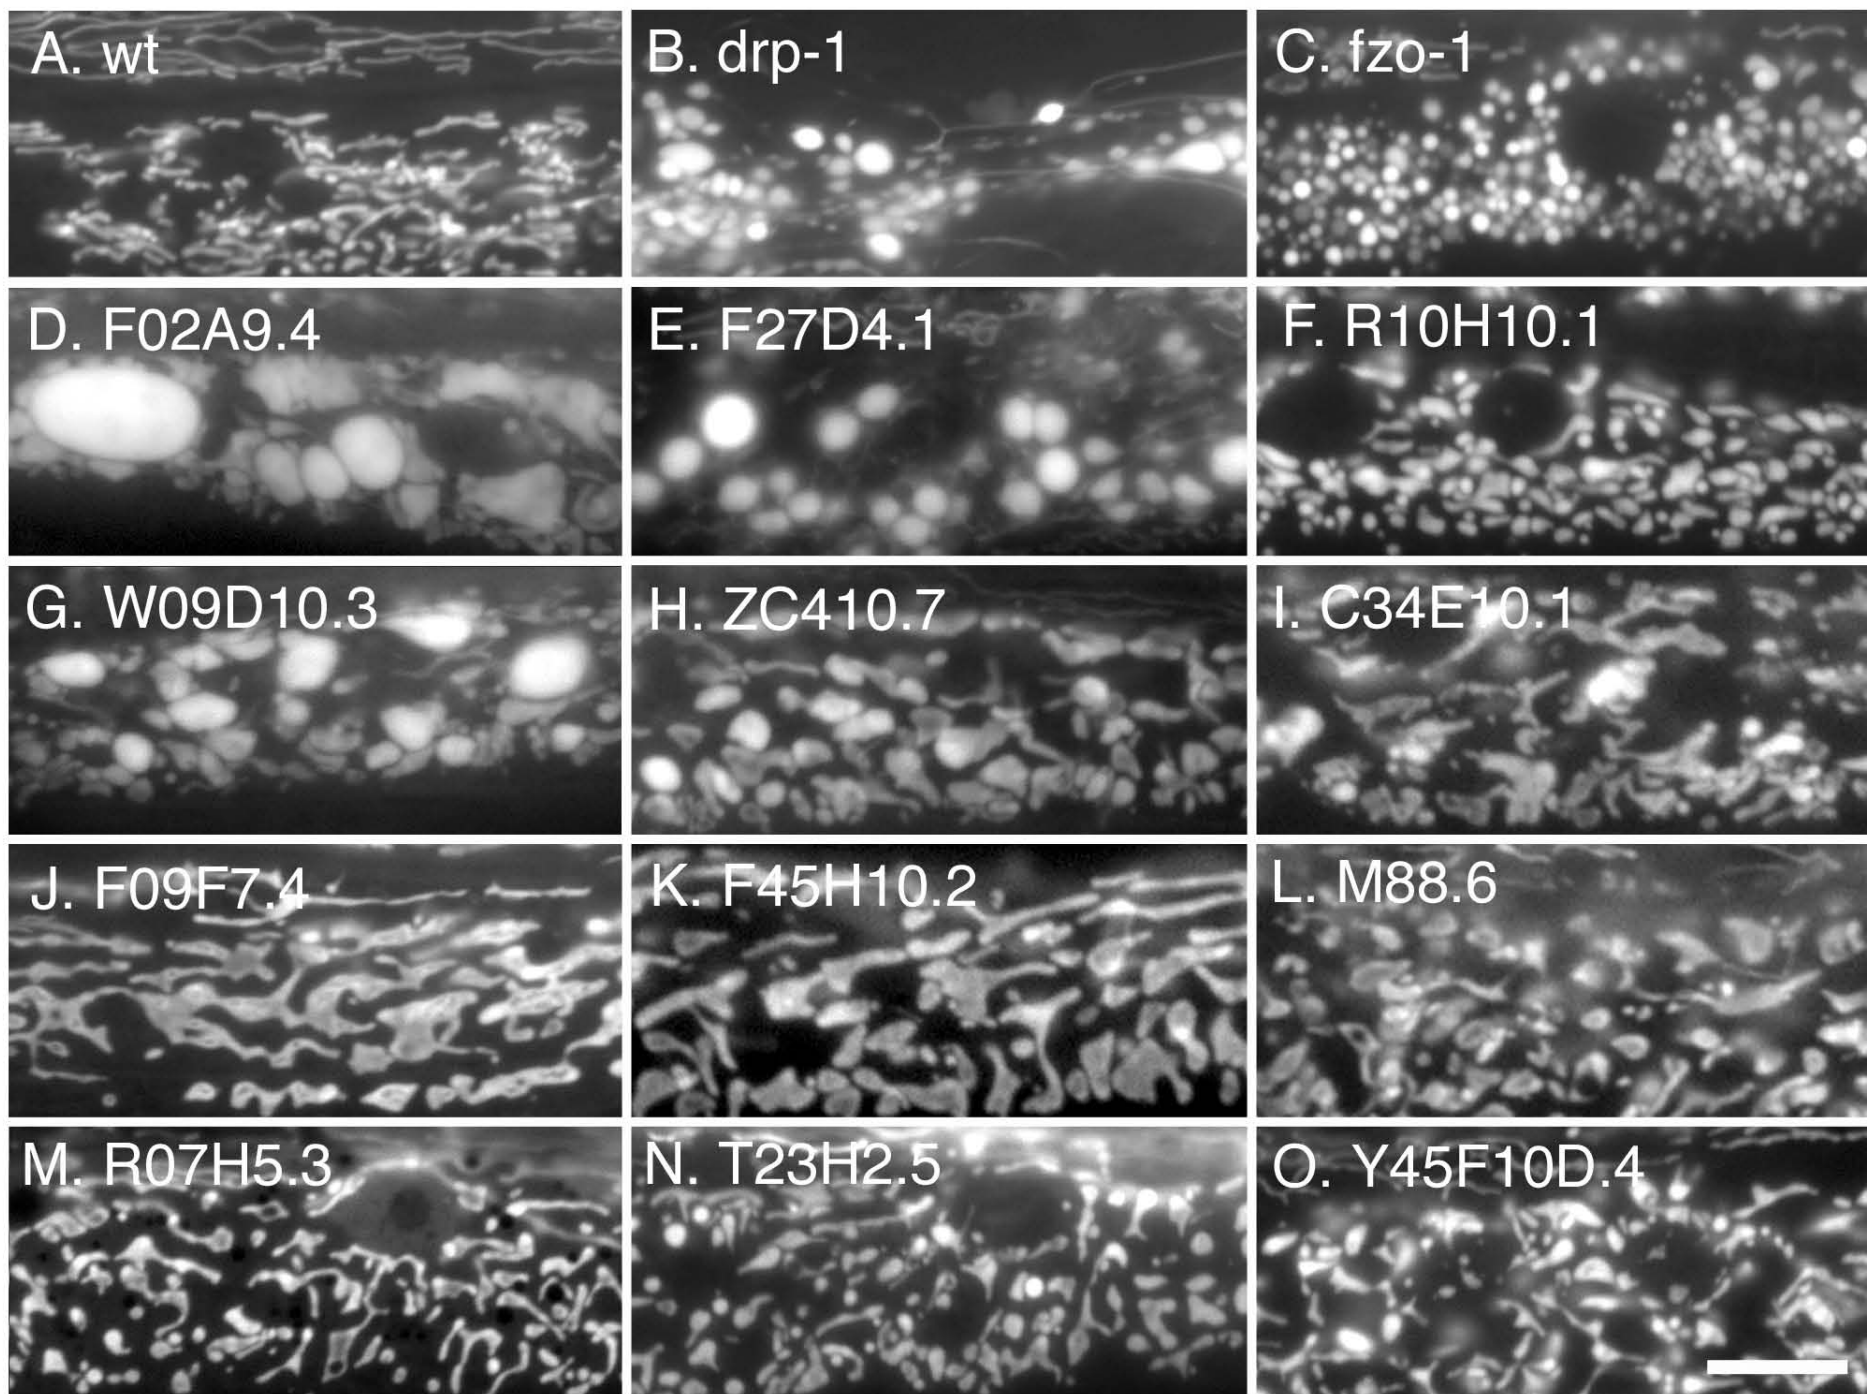

Suppl. Fig. 2. Head et al.

C.e. MOMA-1 M T Q D K P I V E T I S N A G E Q V T N V F G Q F W Q L V T S K N T T N N G D S K P I **K I E Q L P I Y** A E D N A P L K Q  
D.m. CG5903 M L R K T A T M G I M A A V A V K A A P E P Q K P A S S A A D C S L V C R **P S E L P I Y** G S - - L R K T **E**  
H.s. APOO M F K V I Q R S V G P A S L S L L T F K V Y A A P K K D S P P K N S V **K V D E L S L Y** S V - - P E G Q S  
H.s. APOOL M A A I R M G K L T T M P A G L I Y A S V S V H A A K Q E E S K K Q L V **K P I E Q L P I Y** T A - - P P L Q S  
S.p. 1442.05c M T K D F Y R Q L D P V E E K I V P P E N A I V I S S E A K E A T V N E K E A K **Q G V L S** Q R V M K Y I G **E**  
S.c. YGR235C  
S.c. YNL100W M V N F Y D D V D E S K S H G E F P L I **P V V L** Q N S S E L S V R T I P

C.e. MOMA-1 **K F L P E E P L** - - - - - P L Q R E F A T I R I A C E Q E Y D R V A E R F K V V D C A M T Q T **K K A A T K C N A Y L**  
D.m. CG5903 P K P **E R H P P Q** D S V L H K N L E A G V **R I Y V R E E V Q S G Y K A V A D Q A G I V G H Y V E T A K A H T Q S T I D M L**  
H.s. APOO **K Y V E E A R S** - - - - - Q L E E S I S Q L R H Y C E P Y T T **W C Q E T Y S Q T K P K M Q S L V Q W G L D S Y D Y L Q**  
H.s. APOOL **K Y V E E Q P G** - - - - - H L Q M G F A S I R T A T G C Y I G **W C K G V Y V F V K N G I M D T V Q F G K D A Y V Y L K**  
S.p. 1442.05c V N N N P E L K S N F P W L A D R I H E G **R S S I F H A L G Y V G L K T E N A F G - W F L S T E R K T I S T A K N E V F**  
S.c. YGR235C N E L V D G I **S V R D P D Y L K R F F N E R R K Q F S A K W D K V T N K I D D T A G R Y Y A R E E S F T S T I A S L H T**  
S.c. YNL100W T G N **E I I E S** V H L T K W L R K Y R N A L A S Q L D R Y E K **G W Q S K I A N F R L Q V Q H V I N Y S R K N I F N V D S**

C.e. MOMA-1 T E E W T A **L P K A A A I I T V G G M A G F V L G L K R G** - - - - - P V G **R L L T T T I G L A T M A A F C Y P I E A V D**  
D.m. CG5903 N E P Q N S **L H R S G A I I V V G G L A G F I F A A R R G G** - - - - - F I **K K V L Y S G I G A G A V A S M C Y P R Q A E E**  
H.s. APOO N A P P G F F P R L G V I I G F A G L I G L L L A - R G S - - - - - K I **K K L V Y P P G F M G L A A S L Y P Q Q A I V**  
H.s. APOOL N P P R D F **L P K M G V I I T V S G L A G L V S A R K G S** - - - - - K F **K K I T Y P L G L A T L G A T V C Y P V Q S V I**  
S.p. 1442.05c S S D E R K **L P G V A Y V V V G G M A G N I F A R N R I** - - - - - A P A **R W L I T S L S T A A T F M F C F P K T S K N**  
S.c. YGR235C D P N E R L I **P G L L S I L V A S M T G S V L A R R R T** - - - - - W L L **R A T M P I I L G S C C F A Y A M P T T F R N**  
S.c. YNL100W E N K H T V V **P G S L I A L G A F F A G S I A V N R S N** - 20 a.a. - S L P S **R I L L P W V L A A A T F K Y W A P Q T S Q N**

C.e. MOMA-1 V **A K T G R A H A E Q T W Y S F Q E S P T P S A I V K T N L S P P K**  
D.m. CG5903 N C R **V V L Y E G R K I F A V A Y N F I K G V K P G E D V P V V P P F T S L E D L K Y M A S D L Y D E A K D L I F P K K**  
H.s. APOO F **A Q V S G E R L Y D W G L R G Y I V I E D L W K E N F Q K P G N V K N S P G T K**  
H.s. APOOL I **A K V T A K R Y M L Q A S K F L E Q L N H C G Q K A A K K S H S L N L K K K T K L G S S S E I E V P A K T T H V L K H**  
S.p. 1442.05c I G A F V E K **R F P A I R K Q R M L V L E Q T Q K N I Q N A Q K S M T S A V E G V Q K H Y E N A V K K I K G D**  
S.c. YGR235C T M G L I H N L E M N T F P H **F T E R Q D R V W K E T K R L S T A S V Q Y Y D A K K W L N K D V E K T G N A I K N W T**  
S.c. YNL100W L V N A T E N D L L P A D F V K S Y H N T W K R T Y E E G Y V A K K C D L K R Q I D Q T L Q K N I R Y **A R E Q L Y E K L**

C.e. MOMA-1 K  
D.m. CG5903 SV P L P T E L S S G A K T K S E S T S G A T Q F M P D P K L M D H G Q S H L E D I D M Y S T R S  
H.s. APOO G V N V K  
H.s. APOOL E Q A  
S.p. 1442.05c  
S.c. YGR235C  
S.c. YNL100W

Suppl. Fig. 3. Head et al.

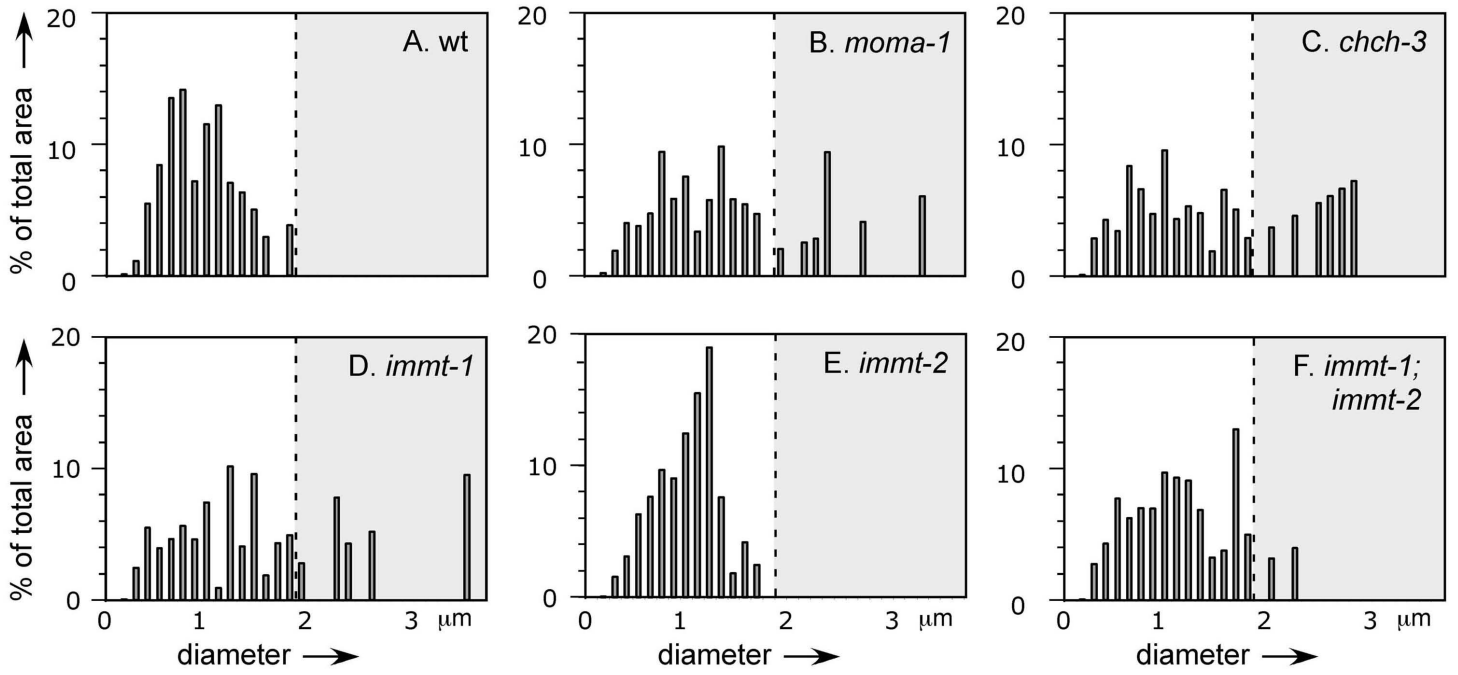

G. Brood size

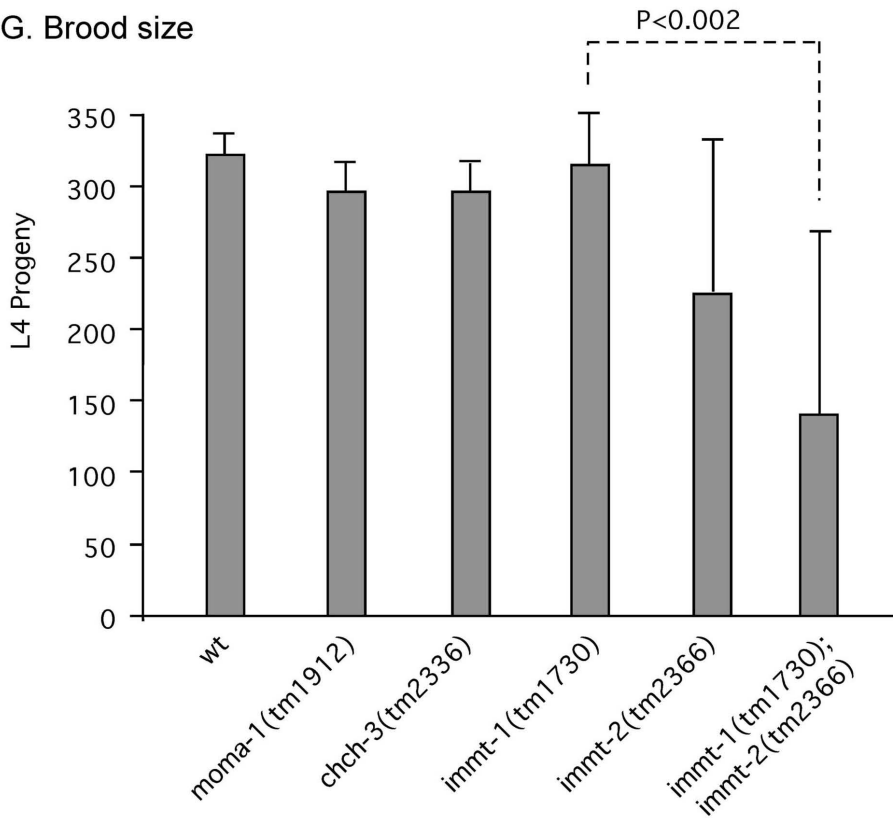

Suppl. Fig. 4. Head et al.



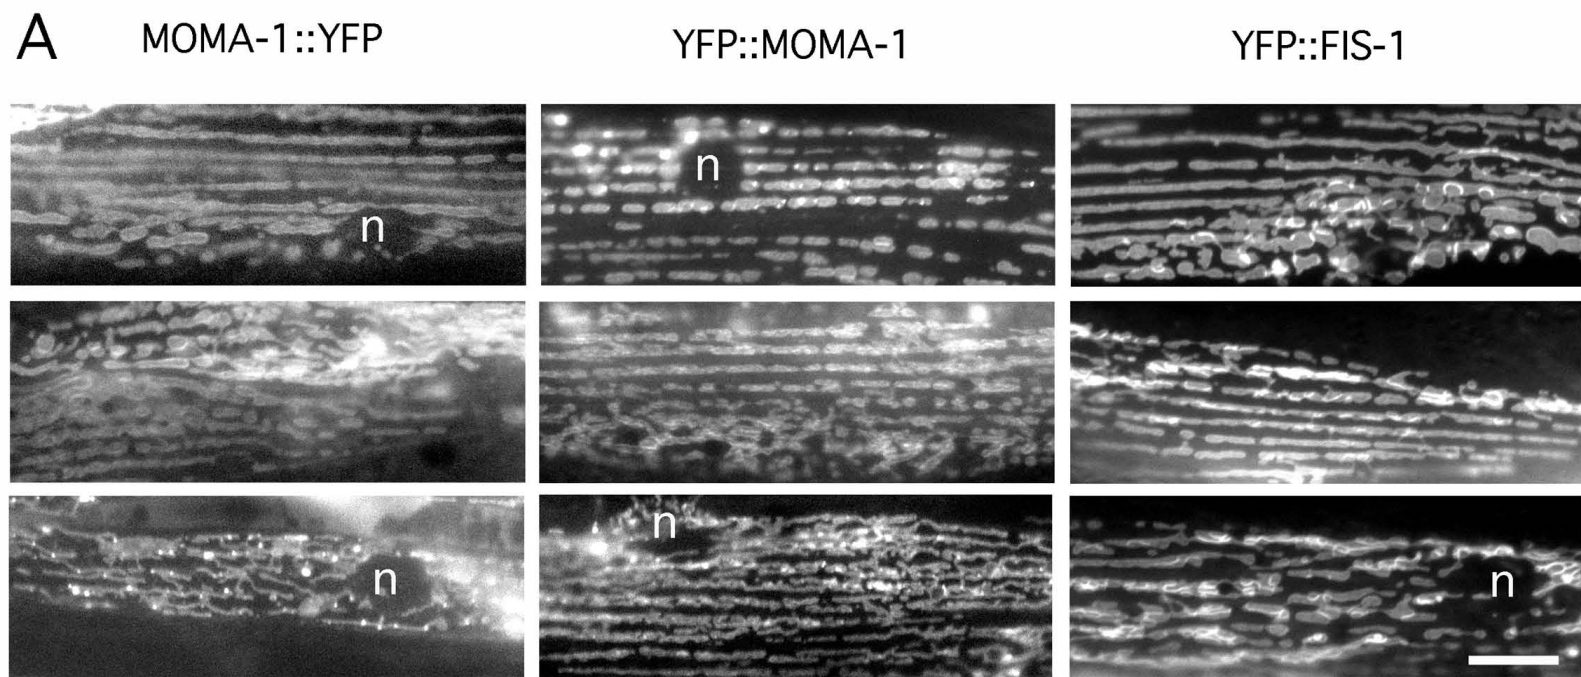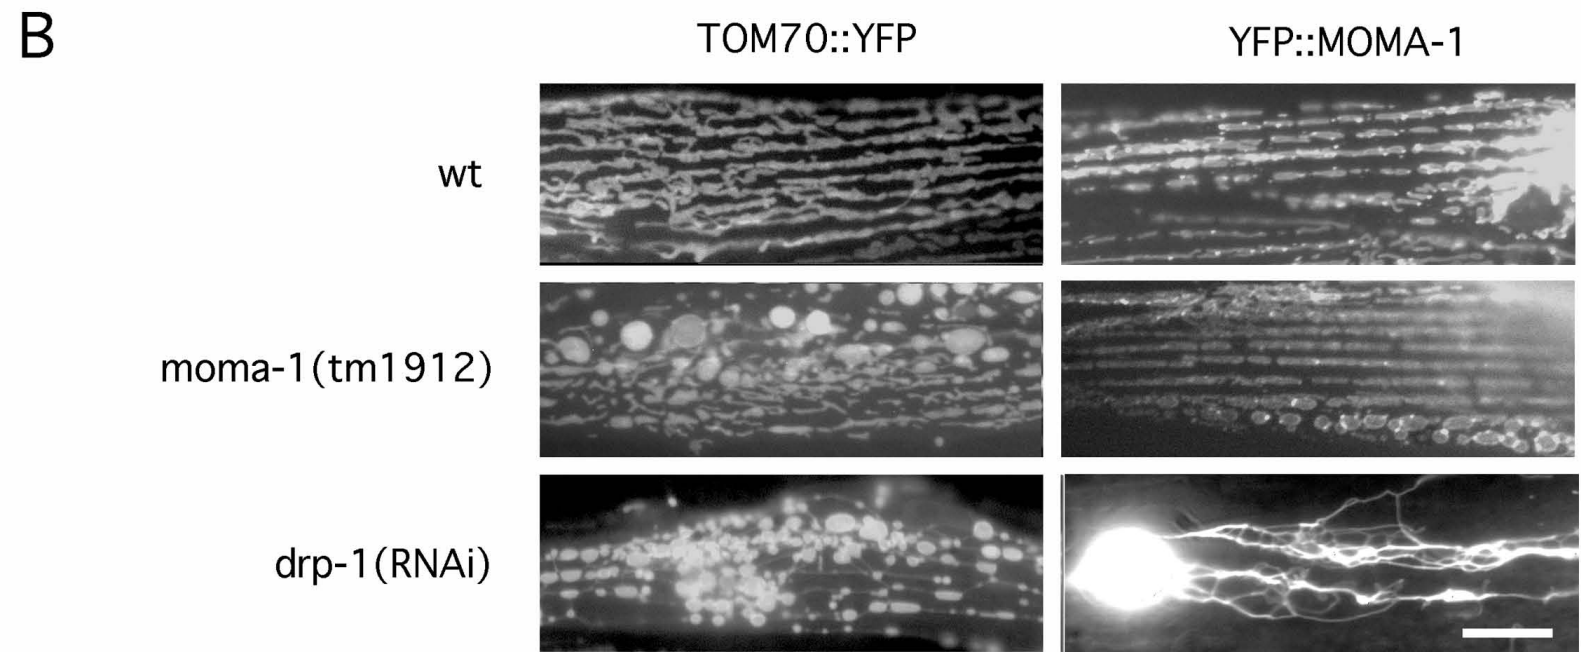

Suppl. Fig. 5. Head et al.

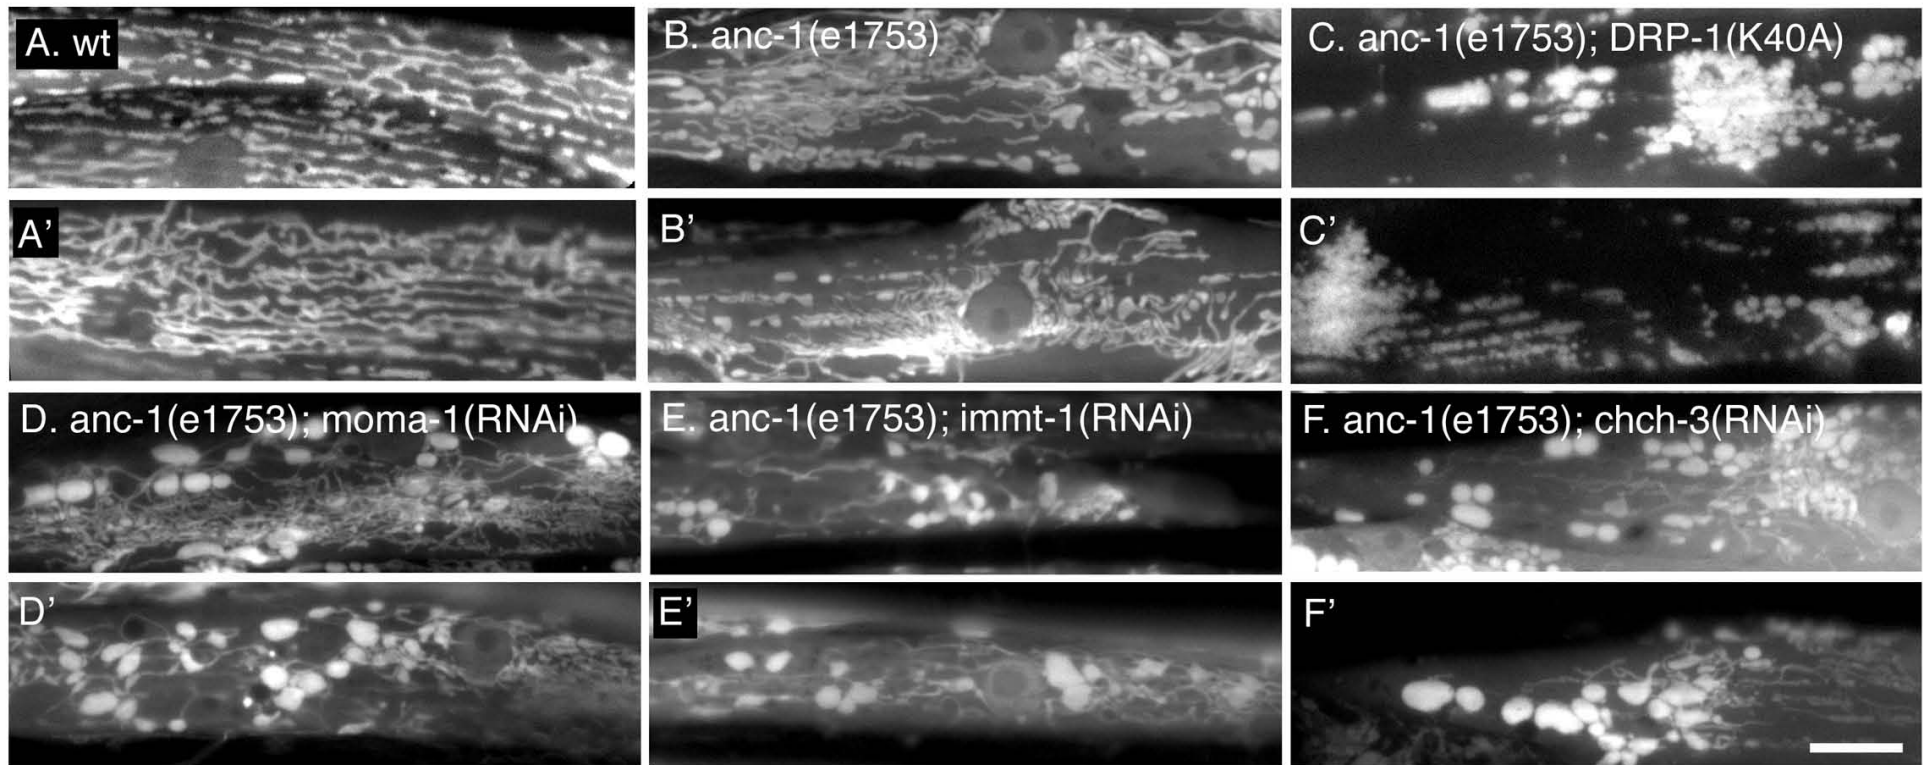

Suppl. Fig. 6. Head et al.
